# Supplementary figures and images for: A Real-Time Near-Infrared Fluorescence Imaging Method for the Detection of Oral Cancers in Mice Using an Indocyanine Green–Labeled Podoplanin Antibody
Source: PubMed Central journal article supplement — Technol Cancer Res Treat. 2018 Apr 12;17:1533033818767936. doi: 10.1177/1533033818767936 (PMC5900824; doi:10.1177/1533033818767936), 2018-04-12

Supplement Figure

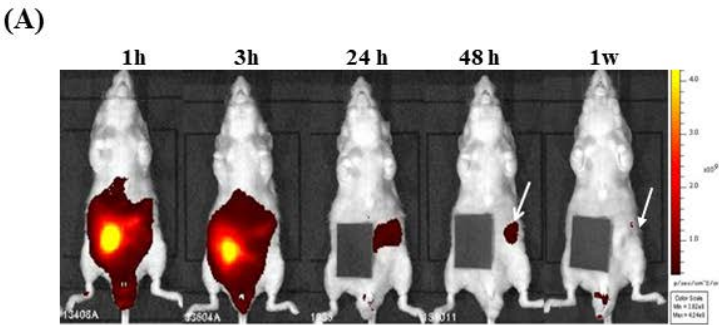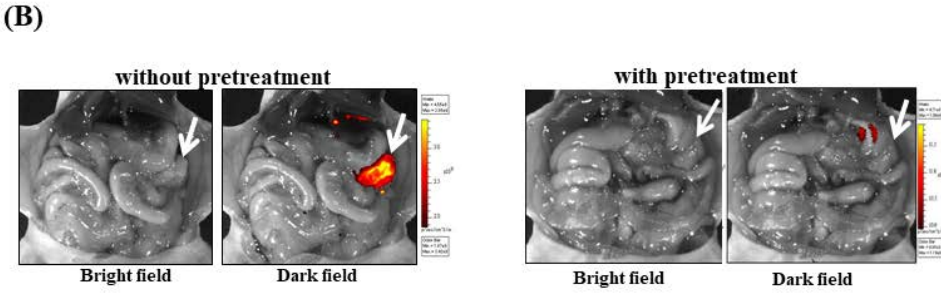

Supplement: Supplement_figure.pdf [file Supplement_figure.pdf]
